# Supplementary material for: Effects of Sacubitril-Valsartan in Heart Failure With Preserved Ejection Fraction in Patients Undergoing Peritoneal Dialysis
Source: PubMed Central journal article supplement (PMC8255468; doi:10.3389/fmed.2021.657067), 2021-06-21
Supplement: Data_Sheet_1.pdf [file Data_Sheet_1.pdf]

SUPPLEMENTARY MATERIAL

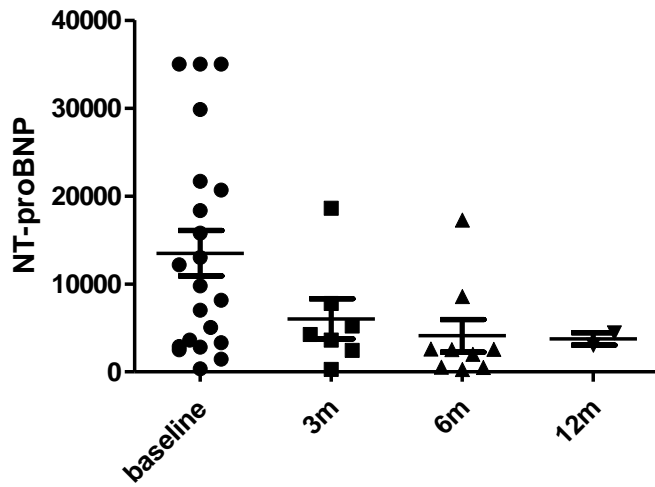

**Figure S1:** NT-proBNP levels of PD patients at baseline, 3months, 6months and 12 months after initiating sacubitril-valsartan.

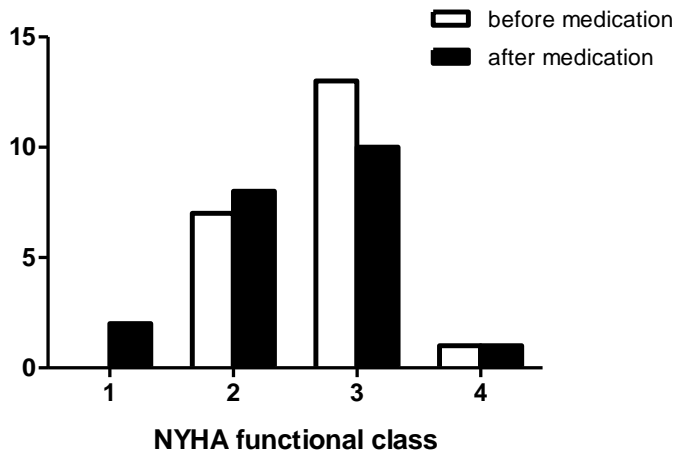

**Figure S2:** NYHA functional class of PD patients before and after initiating sacubitril-valsartan with observation period of 3-12 months.

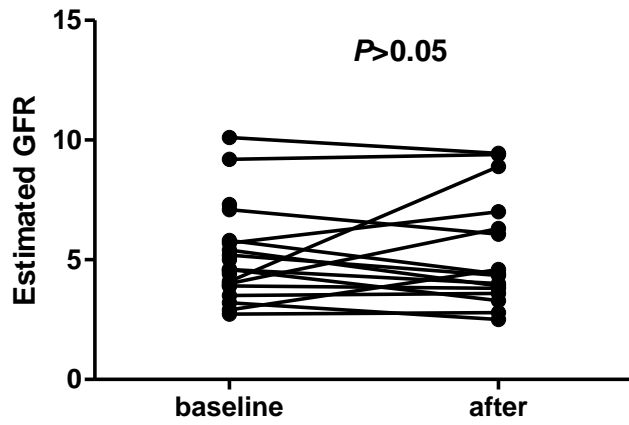

**Figure S3:** Estimated GFR of PD patients before and after initiating sacubitril-valsartan with observation period of 3-12 months. The Wilcoxon matched-pair signed-rank (2 samples) tests was applied to compare self-matching data of eGFR.
